# Supplementary material for: An emerging viral pathogen truncates population age structure in a European amphibian and may reduce population viability
Source: PeerJ journal article supplement (doi:10.7717/peerj.5949), 2018-11-16

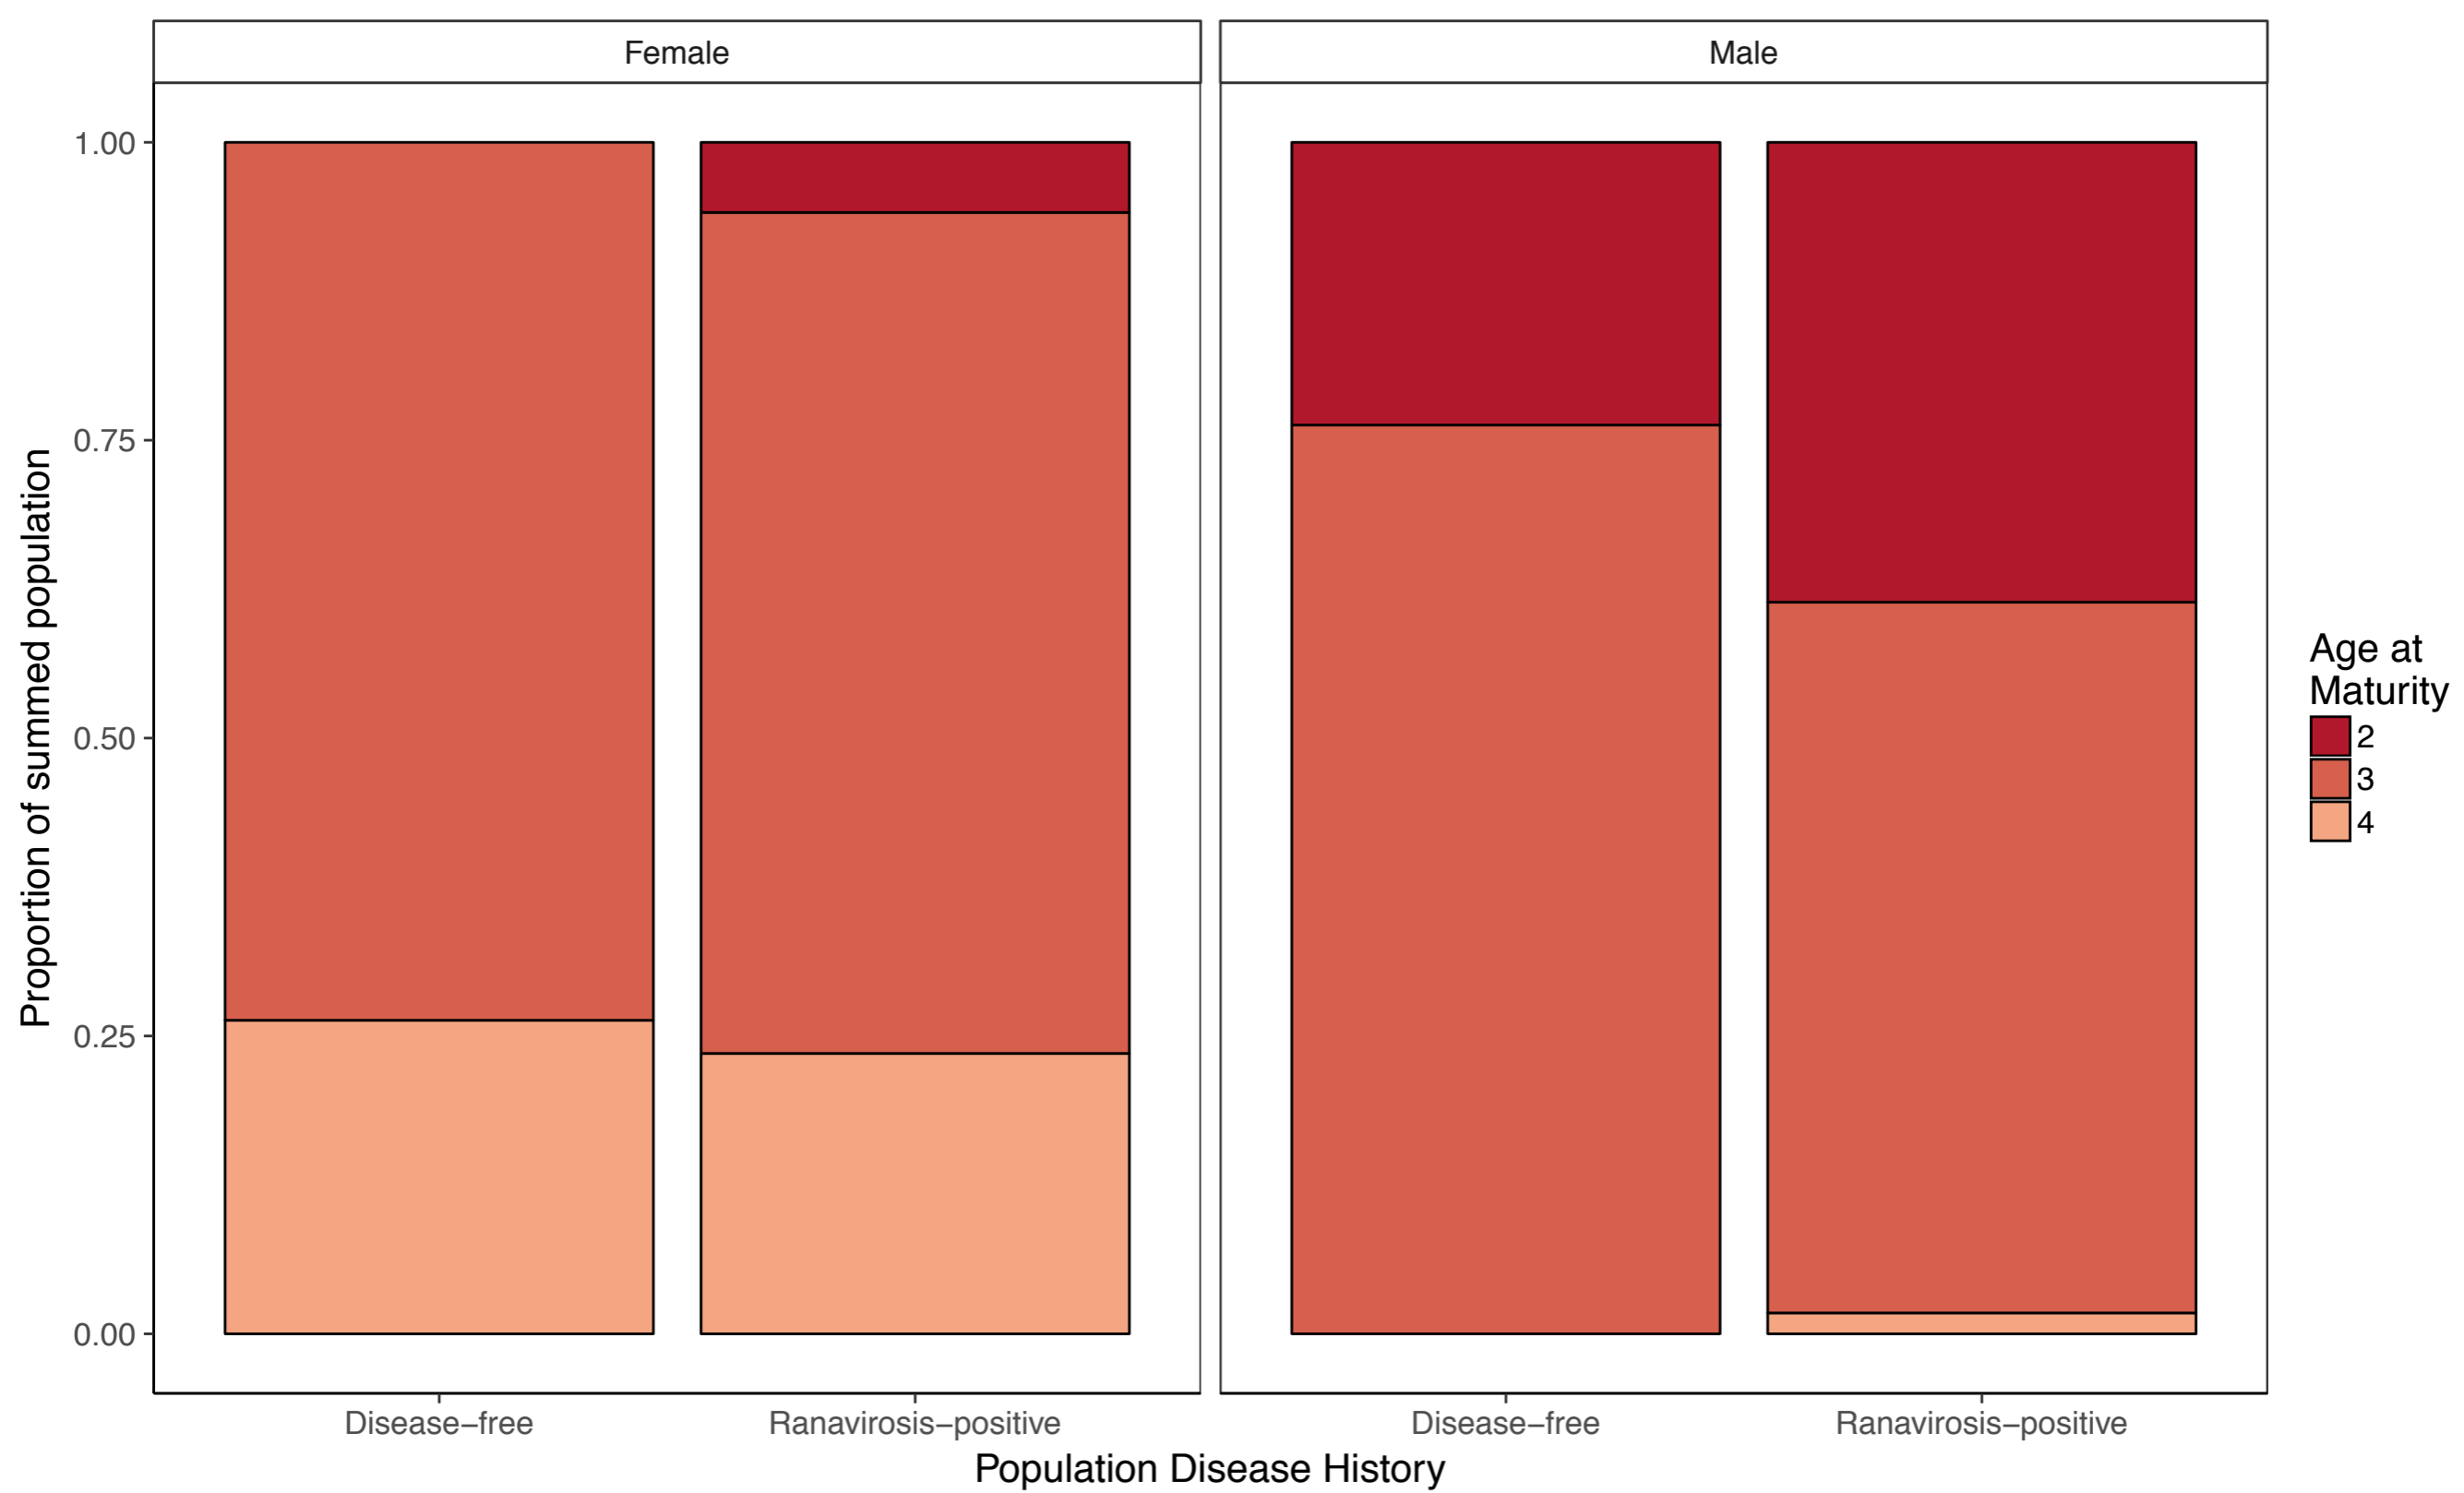

Supplement: Age_at_maturity(FigS2).pdf [file Age_at_maturity%28FigS2%29.pdf]
